# Supplementary material for: An aqueous polysulfide redox flow battery with a semi-fluorinated cation exchange membrane
Source: Royal Society of Chemistry journal article supplement (doi:10.1039/d3ya00509g), 2023-11-25
Supplement: d3ya00509g1.pdf [file d3ya00509g1.pdf]

## Supplementary Information

### Aqueous polysulfide redox flow battery with semi-fluorinated cation exchange membrane

Sooraj Sreenath <sup>a,b</sup>, Nayanthara P. S <sup>a</sup>, Chetan M. Pawar <sup>a,b</sup>, Anish Ash <sup>c</sup>, Bhavana Bhatt <sup>a</sup>,  
Vivek Verma <sup>c,d</sup>, Rajaram K. Nagarale <sup>a,b,\*</sup>

<sup>a</sup>*Electro Membrane Processes Laboratory, Membrane Science and Separation Technology  
Division, CSIR-Central Salt and Marine Chemicals Research Institute, Bhavnagar 364002,  
India*

<sup>b</sup>*Academy of Scientific and Innovative Research (AcSIR), Ghaziabad 201002, India*

<sup>c</sup>*Department of Materials Science and Engineering, Indian Institute of Technology-Kanpur,  
Kanpur-208016, India*

<sup>d</sup>*Centre for Environmental Sciences and Engineering, Indian Institute of Technology-Kanpur,  
Kanpur, India – 208016*

Corresponding author e-mail: [rknagarale@csmcri.res.in](mailto:rknagarale@csmcri.res.in)

### Figures

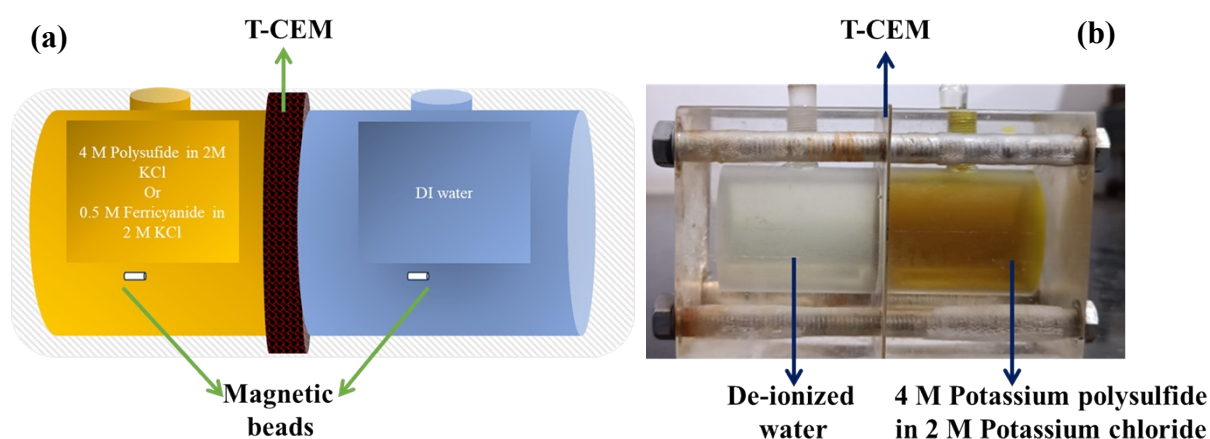

Figure 1. (a) Schematic of the employed two-component cell and (b) Digital photograph of the two-component cell.

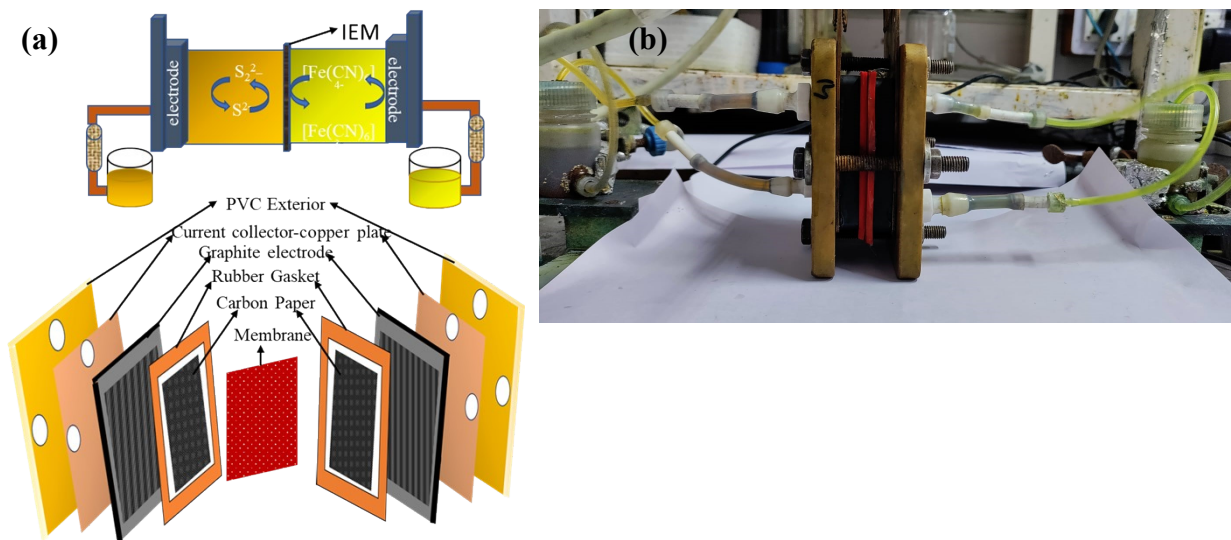

Figure S2. (a) Schematic of the polysulfide-ferricyanide redox flow battery and (b) Digital photograph of the assembled polysulfide-ferricyanide redox flow battery

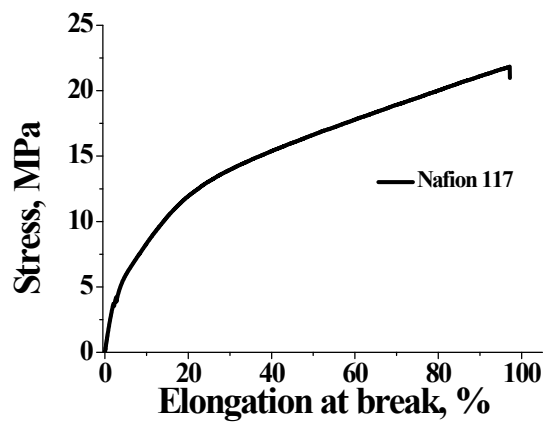

Figure S3. Universal testing machine (UTM) analysis of Nafion-117.
